# Supplementary material for: FOXP4 differentially controls cold-induced beige adipocyte differentiation and thermogenesis
Source: Oxford University Press journal article supplement (doi:10.1242/dev.200260), 2022-03-17
Supplement: dev200260supp.pdf [file dev200260supp.pdf]

## Figure S1

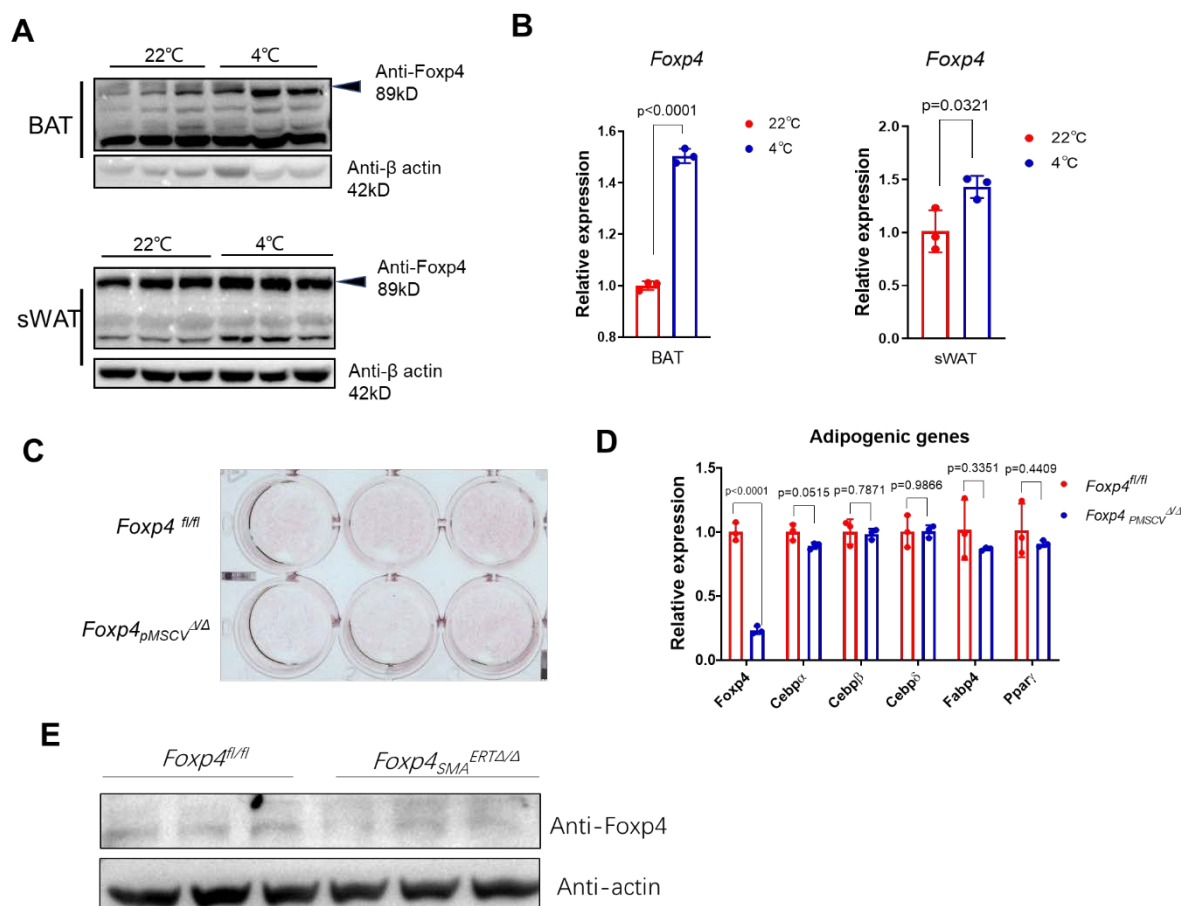

**Fig. S1. Expression of *Foxp4* in adipose tissues at cold exposure, by *pMSCV-Cre* or *SMA-CreER*.**

- (A) Western blot for FOXP4 protein in BAT and sWAT of mice under room temperature (22°C) and one-week cold exposure (4°C). Three independent experiments were replicated.
- (B) mRNA levels of *Foxp4* expression in BAT and sWAT from mice of (A). n, 3.
- (C) Oil Red O staining for 8-day white adipocyte differentiation from *pMSCV-Cre*-transfected SVF of sWAT from *Foxp4<sup>fl/fl</sup>* mice.
- (D) mRNA levels of adipogenesis markers in cells of (C). n, 3.
- (E) FOXP4 protein expression in SVF cells from *Foxp4<sup>Sma<sup>ERTΔΔ</sup></sup>* mice. Three independent experiments were replicated.

Figure S2

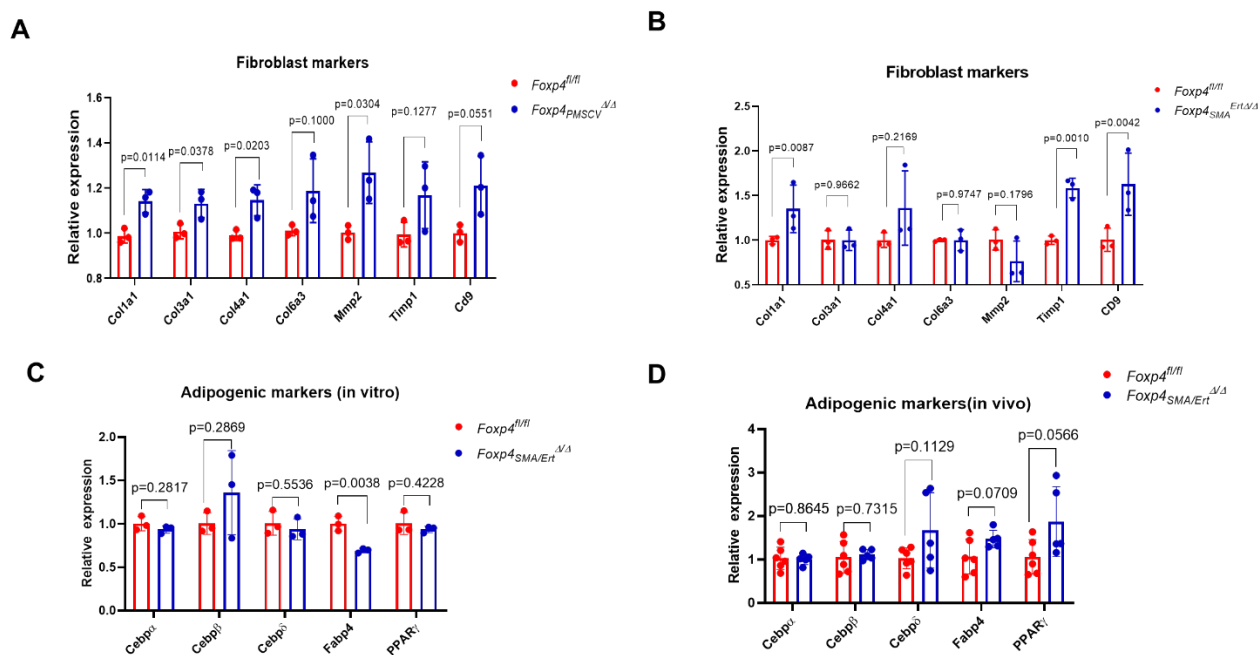

**Fig. S2. *In vitro* beige adipocyte differentiation with *Foxp4* deficiency by *pMSCV-Cre*.**

- (A) mRNA levels of fibroblast cell marker genes in beige differentiation from SVF with *Foxp4* inactivation induced by *pMSCV-Cre*.
- (B) mRNA levels of fibroblast cell marker genes in beige differentiation from SVF of *Foxp4<sup>Sma<sup>ERT</sup>/Δ</sup>* mice with *Foxp4* inactivation induced by 4-OH tamoxifen in cultures.
- (C) mRNA levels of general adipogenic markers in beige differentiation from SVF of *Foxp4<sup>Sma<sup>ERT</sup>/Δ</sup>* mice with *Foxp4* inactivation induced by tamoxifen injection.
- (D) mRNA levels of general adipogenic markers in beige differentiation from SVF of *Foxp4<sup>Sma<sup>ERT</sup>/Δ</sup>* mice with *Foxp4* inactivation induced by 4-OH tamoxifen in cultures.

Figure S3

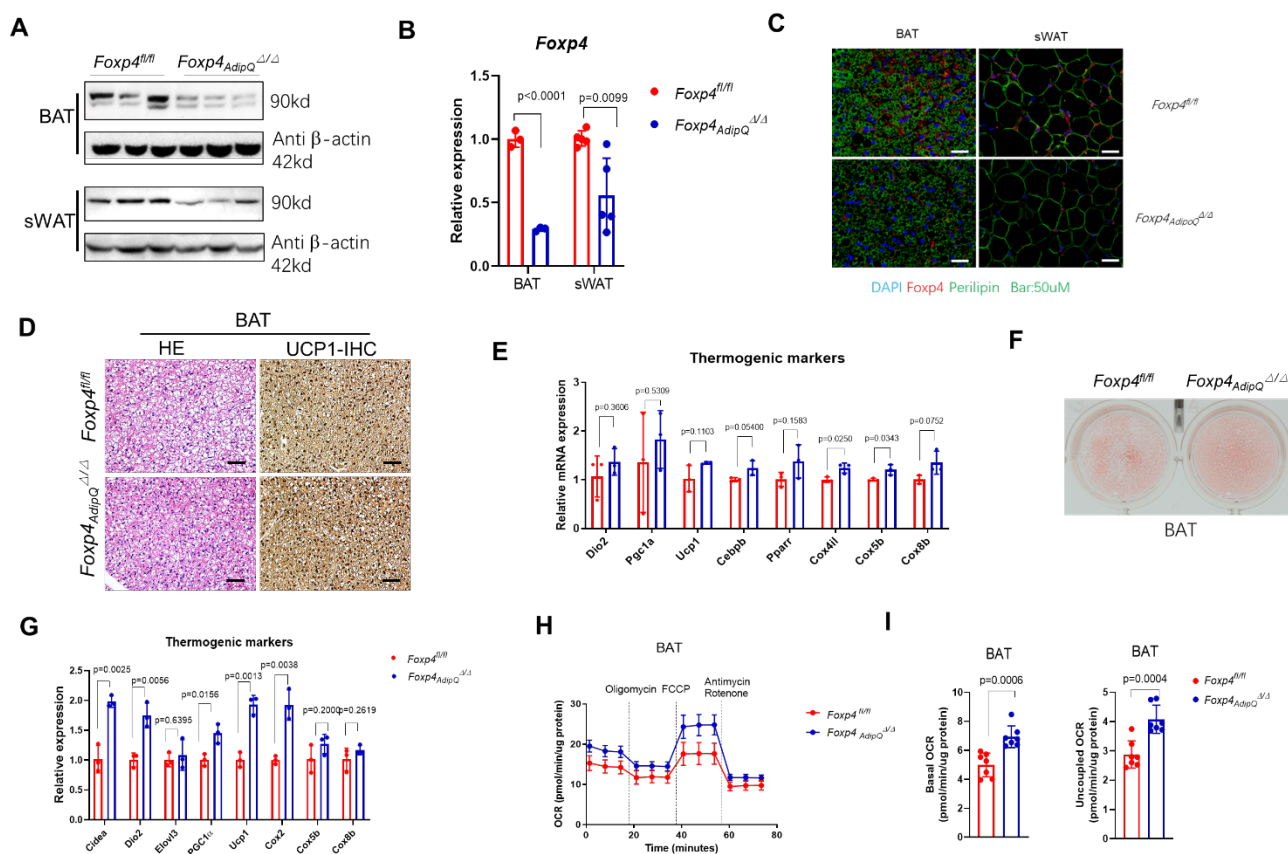

### Fig. S3. Thermogenesis in BAT of *Foxp4<sup>AdipQ</sup> $\Delta/\Delta$* mice.

- (A) Western blot for FOXP4 protein in BAT and sWAT of *Foxp4<sup>fl/fl</sup>* and *Foxp4<sup>AdipQ</sup> $\Delta/\Delta$*  mice at age of 2 months old. Three independent experiments were replicated.
- (B) Assessment of *Foxp4* mRNA expression in BAT and sWAT from mice by qPCR. n, 3~5.
- (C) Immunofluorescence examination for FOXP4 on sections from BAT and sWAT of 2-month-old *Foxp4<sup>fl/fl</sup>* and *Foxp4<sup>AdipQ</sup> $\Delta/\Delta$*  mice.
- (D) H&E and immunohistochemical staining (IHC) for UCP1 on BAT sections from *Foxp4<sup>AdipQ</sup> $\Delta/\Delta$*  mice. Three independent experiments were replicated.
- (E) mRNA levels of thermogenic and mitochondrial markers in BAT.
- (F) Oil Red O staining 8 day post brown adipocyte differentiation from BAT-SVF of *Foxp4<sup>fl/fl</sup>* and *Foxp4<sup>AdipQ</sup> $\Delta/\Delta$*  mice at age of 8 weeks. Three independent experiments were replicated.
- (G) mRNA levels of thermogenic markers for brown adipocytes in (F). n, 3.
- (H) Oxygen consumption rate (OCR) was measured for brown adipocytes from (F).

Uncoupled respiration was recorded after oligomycin inhibition of ATP synthesis, and maximal respiration following stimulation with carbonyl cyanide 4-(trifluoromethoxy) phenylhydrazone (FCCP). n,7.

(I) Quantitative analysis of basal and uncoupled OCR in (H). n, 7.

Figure S4

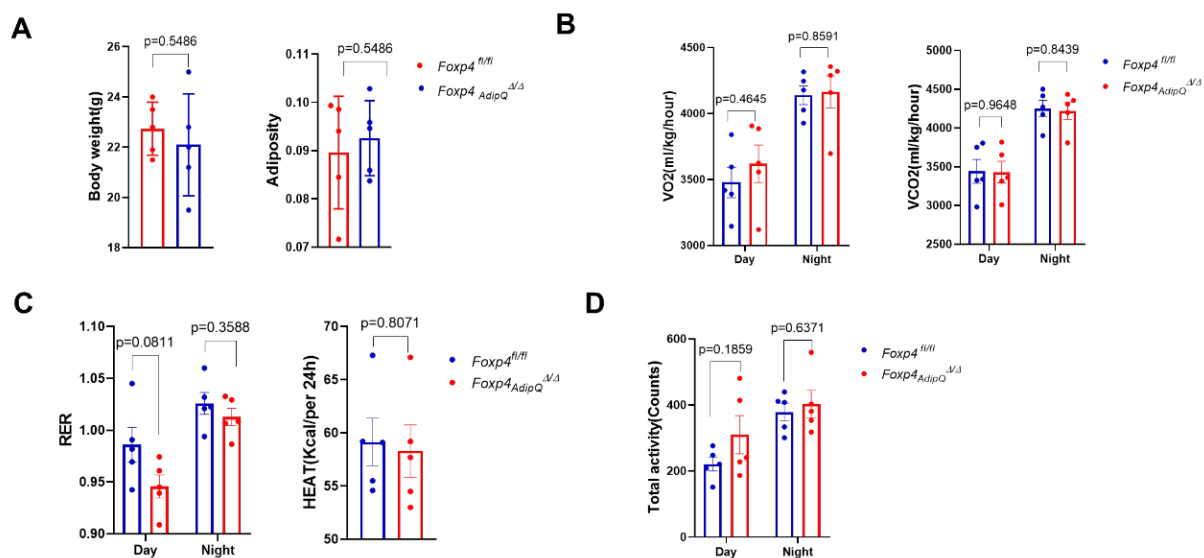

**Fig. S4. Metabolic analysis for *Foxp4*<sup>AdipQ</sup> $\Delta/\Delta$  mice.**

- (A) Body weight and relative adiposity of *Foxp4*<sup>fl/fl</sup> and *Foxp4*<sup>AdipQ</sup> $\Delta/\Delta$  mice during day and night in metabolic cages at age of 3 months old. n, 5.
- (B) Quantification of O<sub>2</sub> and CO<sub>2</sub> consumption of mice under room temperature. n, 5.
- (C) RER and heat production of mice. n, 5.
- (D) Total activity of mice. n, 5.

Figure S5

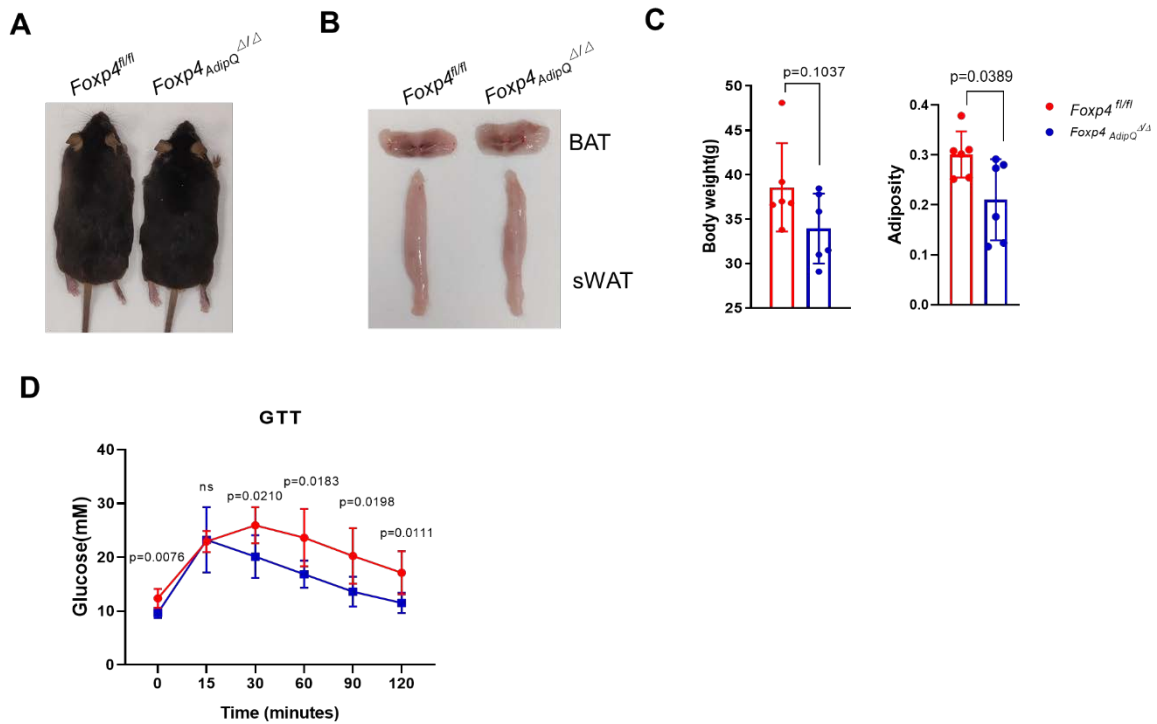

**Fig. S5. *Foxp4* deficiency protects mice from HFD-fed obesity.**

- (A) Dorsal view of representative *Foxp4<sup>fl/fl</sup>* and *Foxp4<sup>AdipQ<sup>Δ/Δ</sup></sup>* mice of after 8-week feeding with HFD at age of 2 months.
- (B) Representative fat depot of BAT and sWAT from mice of (A).
- (C) Body weight and relative adiposity of HFD-fed mice of (A). n, 6.
- (D) GTT of HFD-fed mice. n, 6.

Figure S6

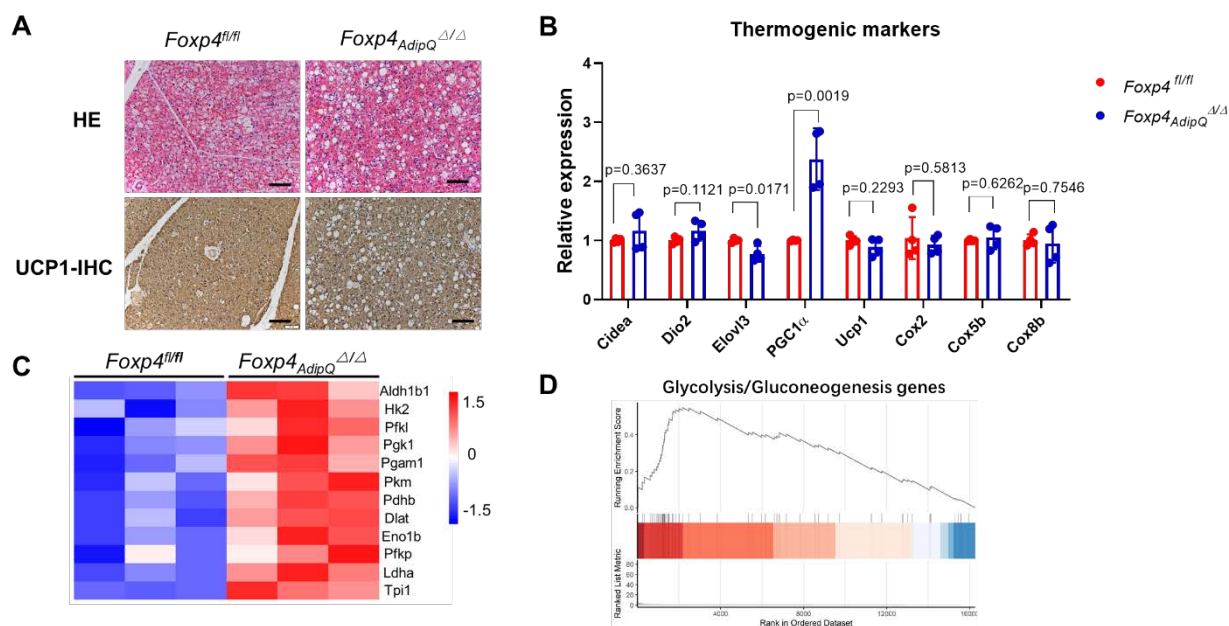

**Fig. S6. BAT thermogenesis in *Foxp4<sup>AdipQ</sup><sup>Δ/Δ</sup>* mice upon cold exposure.**

- (A) H&E and immunohistochemistry (IHC) staining for UCP1 protein on BAT sections from *Foxp4<sup>AdipQ</sup><sup>Δ/Δ</sup>* mice after one-week cold exposure at 4°C. Three independent experiments were replicated.
- (B) Thermogenesis in BAT of (A) assessed by qPCR with selective markers (*Cidea*, *Dio2*, *Elovl3*, *PGC1 $\alpha$* , *Ucp1*, *Cox2*, *Cox5b*, *Cox8b*). n, 3.
- (C) Heatmap depicting the mRNA levels of glycolytic genes in beige adipocytes from sWAT in *Foxp4<sup>AdipQ</sup><sup>Δ/Δ</sup>* mice after one-week cold exposure at 4°C.
- (D) Gene set enrichment analysis of glycolytic marker gene expressions in sWAT of (C).

Figure S7

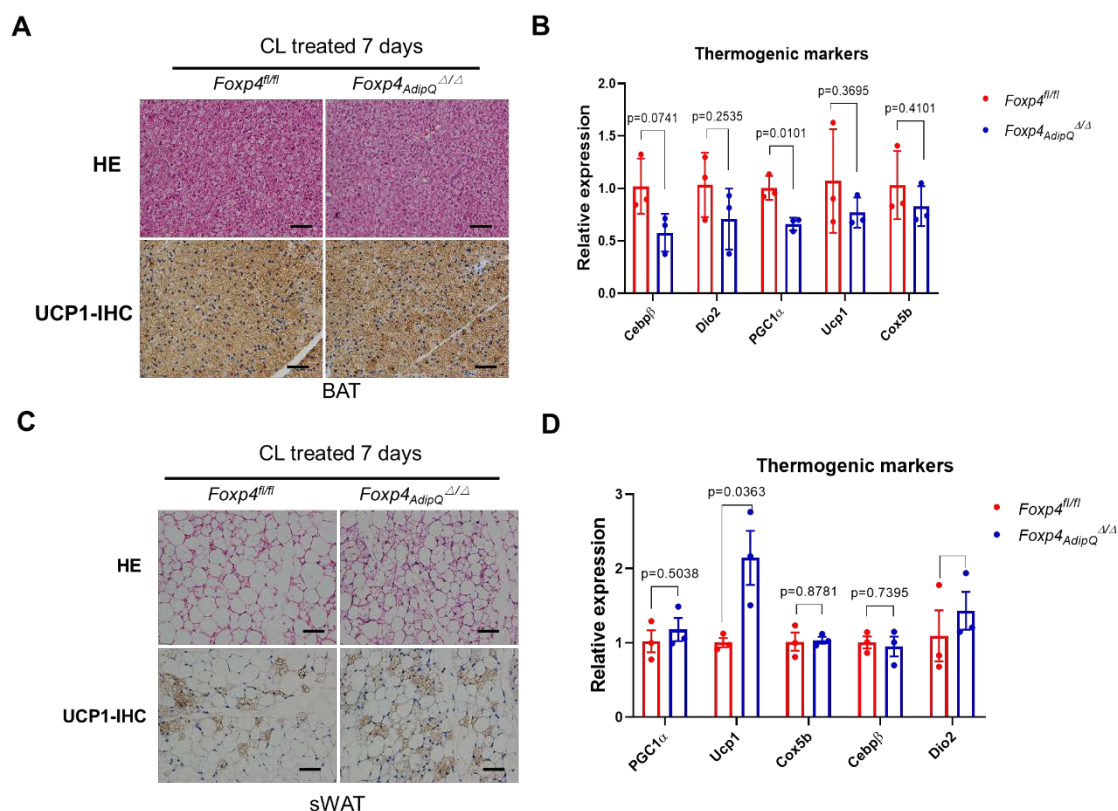

**Fig. S7. Thermogenic activation in CL-316,243-stimulated *Foxp4<sup>AdipQ</sup><sup>Δ/Δ</sup> mice.***

(A, C) H&E and IHC staining for UCP1 on BAT (A) and sWAT (C) sections from mice stimulated with CL-316,243 for 7 days. Three independent experiments were replicated.

(B, D) qPCR analysis for thermogenic gene expressions in BAT (B) and sWAT (D) from CL-316,243-stimulated mice. n, 3.



## Figure S8

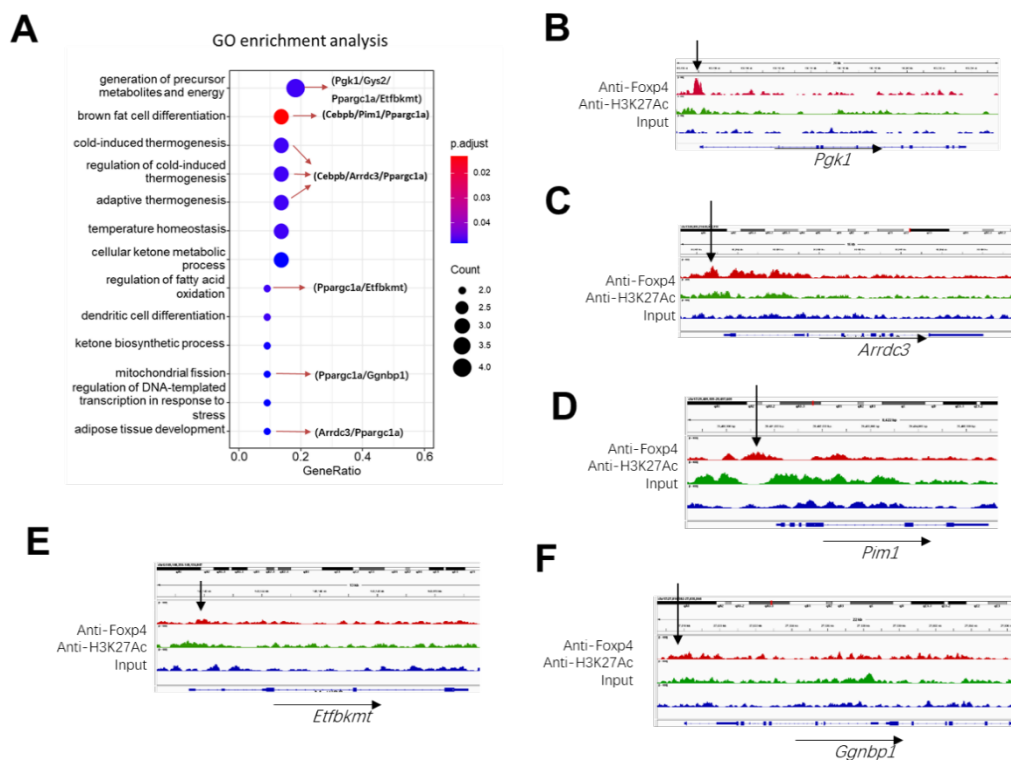

**Fig. S8. Crossover examinations of RNA-seq and ChIP-seq data to identify putative FOXP4 targeting genes.**

(A) GO enrichment analysis for several putative FOXP4-targeting genes.

(B-F) ChIP-seq profile showed the FOXP4 binding sites (black arrows) within *Pgk1*,

*Arrdc3*, *Pim1*, *Etfbkmt*, *Ggnbp1* gene regions.

**Table S1.** Primers for qPCR and genotyping

| primer for qPCR                 |   |                           |
|---------------------------------|---|---------------------------|
| <i>Foxp4</i>                    | F | GTGTCTGTGGCCATGATGTC      |
|                                 | R | TCTTTGGGCTGCTGTTTTCC      |
| <i>Adrb3</i>                    | F | GGCCCTCTCTAGTTCCCAG       |
|                                 | R | TAGCCATCAAACCTGTTGAGC     |
| <i>Ucp1</i>                     | F | ACTGCCACACCTCCAGTCATT     |
|                                 | R | CTTTGCCTCACTCAGGATTGG     |
| <i>PGC1<math>\alpha</math></i>  | F | AGCCGTGACCACTGACAACGAG    |
|                                 | R | GCTGCATGGTTCTGAGTGCTAAG   |
| <i>Cebpa</i>                    | F | TGGACAAGAAGACGCAACGAG     |
|                                 | R | TCACTGGTCAACTCCAGCAC      |
| <i>Cebp<math>\beta</math></i>   | F | ACGACTTCCTCTCCGACCTCT     |
|                                 | R | CGAGGCTCACGTAACCGTAGT     |
| <i>Dio2</i>                     | F | CAGTGTGGTGCACGTCTCCAATC   |
|                                 | R | TGAACCAAAGTTGACCACCAG     |
| <i>Prdm16</i>                   | F | CCACCAGCGAGGACTTCAC       |
|                                 | R | GGAGGACTCTCGTAGCTCGAA     |
| <i>Cox2</i>                     | F | GCAAGCATAAGACTGGACCAA     |
|                                 | R | TTGTTGGCATCTGTGTAAGAGAATC |
| <i>Cox4il</i>                   | F | ACCAAGCGAATGCTGGACAT      |
|                                 | R | GGCGGAGAAGCCCTGAA         |
| <i><math>\beta</math>-actin</i> | F | AGAGGGAAATCGTGCGTGACA     |
|                                 | R | CACTGTGTTGGCATAGAGGTC     |
| <i>Elovl3</i>                   | F | TCCGCGTTCTCATGTAGGTCT     |
|                                 | R | GGACCTGATGCAACCCTATGA     |
| <i>Cox5b</i>                    | F | GCTGCATCTGTGAAGAGGACAAC   |
|                                 | R | CAGCTTGTAATGGGTTCCACAGT   |
| <i>Cox8b</i>                    | F | TGTGGGGATCTCAGCCATAGT     |
|                                 | R | AGTGGGCTAAGACCCATCCTG     |
| <i>PPAR<math>\alpha</math></i>  | F | GCGTACGGCAATGGCTTTAT      |
|                                 | R | GAACGGCTTCCTCAGGTTCTT     |
| <i>PPAR<math>\gamma</math></i>  | F | GGAAAGACAACGGACAAATCAC    |
|                                 | R | TACGGATCGAAACTGGCAC       |
| <i>Cox7a1</i>                   | F | CAGCGTCATGGTCAGTCTGT      |
|                                 | R | AGAAAACCGTGTGGCAGAGA      |
| <i>Cidea</i>                    | F | TGCTCTTCTGTATCGCCCAGT     |
|                                 | R | GCCGTGTTAAGGAATCTGCTG     |

|                |   |                         |
|----------------|---|-------------------------|
| <i>Rgs2</i>    | F | GAGAAAATGAAGCGGACACTCT  |
|                | R | GCAGCCAGCCCATATTTACTG   |
| <i>CD137</i>   | F | CGTGCAGAACTCCTGTGATAAC  |
|                | R | GTCCACCTATGCTGGAGAAGG   |
| <i>Them26</i>  | F | ACCCTGTCATCCCACAGAG     |
|                | R | TGTTTGGTGGAGTCCTAAGGTC  |
| <i>Tbx1</i>    | F | GGCAGGCAGACGAATGTTC     |
|                | R | TTGTCATCTACGGGCACAAAG   |
| <i>Cd40</i>    | F | TTGTTGACAGCGGTCCATCTA   |
|                | R | CCATCGTGGAGGTAAGTGTGTTG |
| <i>Ear2</i>    | F | CCTGTAACCCCGAAGTCCA     |
|                | R | CAGATGAGCAAAGGTGCAA     |
| <i>Klhl13</i>  | F | AGAATTGGTTGCTGCAATACTCC |
|                | R | AAGGCACAGTTTCAAGTGCTG   |
| <i>Slc27a1</i> | F | CTGGGACTTCCGTGGACCT     |
|                | R | TCTTGCAGACGATACGCAGAA   |

*primer for genotyping*

|                                     |   |                        |
|-------------------------------------|---|------------------------|
| <i>Foxp4-Floxed</i>                 | F | TGGAGGGACTGGGATTAGAAC  |
|                                     | R | ACGGGAGGCTGAACAACAC    |
| <i>Cre</i>                          | F | TTTCCCGCAGAACCTGAAGA   |
|                                     | R | GGTGCTAACCAGCGTTTTTCGT |
| <i>Pdgfr<math>\alpha</math>-Luc</i> |   |                        |
| Pdgfr $\alpha$ -promoter            | F | CAGAGGGCAGGCATTTGGTAGT |
|                                     | R | GCTTACTGGGACGAACACCA   |
